# Supplementary material for: Wnt signaling in liver disease: emerging trends from a bibliometric perspective
Source: PeerJ journal article supplement (doi:10.7717/peerj.7073), 2019-06-21
Supplement: Supplementary_Figure_1.pdf [file Supplementary_Figure_1.pdf]

a. Visualization for all keywords ranged by their calculated values

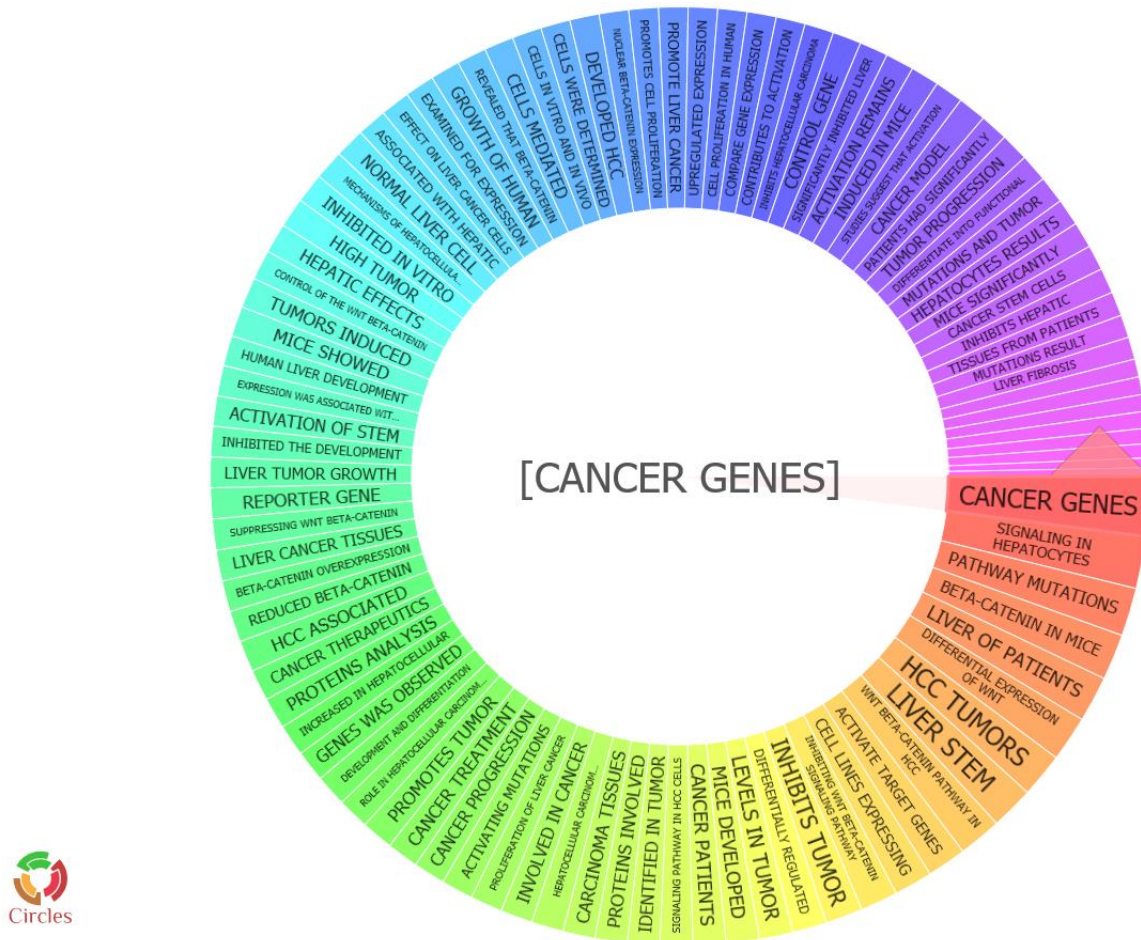

b. Top 10 keywords and their values

- 📁 Cancer Genes (357)
- 📁 Signaling in Hepatocytes (313)
- 📁 Pathway Mutations (290)
- 📁 Beta-catenin in Mice (276)
- 📁 Liver of Patients (276)
- 📁 Differential Expression of Wnt (273)
- 📁 HCC Tumors (267)
- 📁 Liver Stem (259)
- 📁 Wnt Beta-catenin Pathway in HCC (259)
- 📁 Activate Target Genes (236)
